# Supplementary material for: A Novel Ion Channel Formed by Interaction of TRPML3 with TRPV5
Source: PubMed Central journal article supplement (PMC3585263; doi:10.1371/journal.pone.0058174), 2013-02-28
Supplement: pone.0058174.s003.pdf [file pone.0058174.s003.pdf]

| Name  | Accession No. | TMD5 to TMD6 regions                                                                                                       |
|-------|---------------|----------------------------------------------------------------------------------------------------------------------------|
| TRPC1 | NM_003304     | GKFLGMFLLVLSFTIGLTQLYDKGYTSK<br>EQKDCVGIFCEQQSNDTFHSFIGTCFAL<br>FWYIFSLAHVAIFVTRFSYGEELQSFVGA<br>VIVGTYNVVVVIVLTKLLVAMLH   |
| TRPC3 | NM_003305     | FKFMVLFIMVFFAFMIGMFILYSYYLGAK<br>VNAAFTTVEESFKTLFWSIFGLSEVTSVV<br>LKYDHKFIENIGYVLYGIYNVTMVVLLN<br>MLIAMIN                  |
| TRPC4 | NM_016179     | LKFLFIYCLVLLAFANGLNQLYFYEEETK<br>GLTCKGIRCEKQNNAFSTLFETLQSLFW<br>SIFGLINLYVTNVKAQHEFTEFVGATMFG<br>TYNVISLVLLNMLIAMMN       |
| TRPC5 | NM_012471     | LKFLFIYCLVLLAFANGLNQLYFYETRAI<br>DEPNNCKGIRCEKQNNAFSTLFETLQSL<br>FWSVFGLLNLYVTNVKARHEFTEFVGAT<br>MFGTYNVISLVLLNMLIAMMN     |
| TRPC6 | NM_004621     | FKFMVIFIMVFVAFMIGMFNLYSYYIGAK<br>QNEAFTTVEESFKTLFWAIFGLSEVKS<br>VINYNHKFIENIGYVLYGVYNVTMVIVLLN<br>MLIAMIN                  |
| TRPC7 | NM_020389     | FKFMVIFIMVFVAFMIGMFNLYSYYRGAK<br>YNPAFTTVEESFKTLFWSIFGLSEVISVV<br>LKYDHKFIENIGYVLYGVYNVTMVVLLN<br>MLIAMIN                  |
| TRPV1 | NM_080706     | CRFMFVYIVFLFGFSTAVVTLIEDGKNDS<br>LPSESTSHRWRGPACRPPDSSYNSLYS<br>TCLELFKFTIGMGDLEFTENYDFKAVFIIL<br>LLAYVILTYILLLNMLIALMG    |
| TRPV2 | NM_016113     | LRFLLIYLVFLFGFAVALVSLSQEAWRPE<br>APTGNATESVQPMEGQEDEGNGAQY<br>RGILEASLELFKFTIGMGELAFQEQLHFR<br>GMVLLLLLAYVLLTYILLLNMLIALMG |
| TRPV3 | NM_145068     | LKFLFVYIVFLLGFGVALASLIEKCPKDNK<br>DCSSYGSFSDAVLELFKLTIGLGDLNIQQ<br>NSKYPILFLFLLITYVILTFVLLLNMLIALMS                        |
| TRPV4 | NM_021625     | FRFLLVYLLFMIGYASALVSLNPNCANMK<br>VCNEDQTNCTVPTYPSCRDSETFSTFLL<br>DLFKLTIGMGDLEMLSSTKYPVVFILLVT<br>YIILTFVLLLNMLIALMG       |

|       |           |                                                                                                                                     |
|-------|-----------|-------------------------------------------------------------------------------------------------------------------------------------|
| TRPV5 | NM_019841 | MRFCWLMAVVILGFASAFYIIFQTEDPTS<br>LGQFYDYPMALFTTFELFLTVIDAPANYS<br>VDLPMFSIVNFAFAIIATLLMLNLFIAMM<br>G                                |
| TRPV6 | NM_014274 | MRFCWLMAVVILGFASAFYIIFQTEDPEE<br>LGHFYDYPMALFSTFELFLTIDGPANYN<br>VDLPMYSITYAAFAIIATLLMLNLLIAMM<br>G                                 |
| TRPM1 | NM_002420 | LYFVIMLVVLMMSFGVARQAILHPEEKPS<br>WKLARNIFYMPYWMIYGEVFADQIDLYA<br>MEINPPCGENLYDEEGKRLPPCIPGAWL<br>TPALMACYLLVANILLVNLLIAVFN          |
| TRPM2 | NM_003307 | FFFLFLLAVWVVSFGVAKQAILIHNERRV<br>DWLFRGAVYHSYLTIFGQIPGYIDGVNFN<br>PEHCSPNGTDPYKPKCPESDATQQRPA<br>FPEWLTVLLLCLYLLFTNILLNLLIAMFN      |
| TRPM3 | NM-020952 | MYFVIIMLVVLMMSFGVARQAILFPNEEPS<br>WKLAKNIFYMPYWMIYGEVFADQIDPPC<br>GQNETREDGKIIQLPPCKTGAWIVPAIMA<br>CYLLVANILLVNLLIAVFN              |
| TRPM4 | NM_017636 | FFFLFFLGVWLVA YGVATEGLLRPRDSD<br>FPSILRRV FYR PYLQIFGQIPQEDMDVAL<br>MEHSNCSSEPGFWAHPPGAQAGTCVS<br>QYANWLVLVLLL VIFLLVANILLVNLLIAMFS |
| TRPM5 | NM_014555 | FFFLFFLSVWLVA YGVTTQALLHPHDGR<br>LEWIFRRVLYR PYLQIFGQIPLDEIDEARV<br>NCSTHPLLEDSPSCPSLYANWLVILLV<br>TFLLVTNVLLMNLLIAMFS              |
| TRPM6 | NM_017662 | FYIVIIMAI VLLSFGVARKAILSPKEPPSWS<br>LARDIVFEPYWMIYGEVYAGEIDVCSSQ<br>PSCPPGSFLTPFLQAVYLFVQYIIMVNLLI<br>AFFN                          |
| TRPM7 | NM_017672 | FYIVVIMALVLLSFGVPRKAILYPHEAPSW<br>TLAKDIVFHPYWMIFGEVYAYEIDVCAND<br>SVIPQICGPGTWLTPFLQAVYLFVQYIIMV<br>NLLIAFFN                       |
| TRPM8 | NM_024080 | FFFLFLFAVWVMAFGVARQGILRQNEQR<br>WRWIFRSVIYEPYLAMFGQVPSDVDGTT<br>YDFAHCTFTGNESKPLCVELDEHNLPFRF<br>PEWITIPLCIYMLSTNILLVNLLVAMFG       |

|        |           |                                                                                                          |
|--------|-----------|----------------------------------------------------------------------------------------------------------|
| TRPP1  | NM_000297 | FGFAIMFFIIFLAYAQLAYLVFGTQVDDFS<br>TFQECIFTQFRIILGDINFAEIEEANRVLG<br>PIYFTTFVFFMFFILLNMFLAIIN             |
| TRPP2  | NM_016112 | LGFAVMFFIVFFAYAQLGYLLFGTQVENF<br>STFIKCIFTQFRIILGDFDYNDAIDNANRILG<br>PAYFVTYVFFVFFVLLNMFLAIIN            |
| TRPP3  | NM_014386 | VGFAIMFFIIFFFAYAQLGFLVFGSQVDDFS<br>TFQNSIFAQFRIVLGDFNFAGIQQANPIL<br>GPIYFITFIFFVFFVLLNMFLAIIN            |
| TRPML1 | NM_020533 | MRFCCCVAVIYLGYCFCGWIVLGPYHVK<br>FRSLSMVSECLFSLINGDDMFVTFAMQ<br>AQQGRSSLVWLFSQLYLYSFISLFIYMVL<br>SLFIALIL |
| TRPML2 | XM_351263 | LRFCACAGMIYLGYTFCGWIVLGPYHDK<br>FENLNTVAECLFSLVNGDDMFATFAQIQ<br>QKSILVWLF SRLYLYSFISLFIYMILSLFIAL<br>IL  |
| TRPML3 | NM_018298 | IRFCCAAMIYLGYCFCGWIVLGPYHDK<br>FRSLNMVSECLFSLINGDDMFATFAKMQ<br>QKSYLVWLF SRIYLYSFISLFIYMILSLFIA<br>LIL   |
